# Supplementary material
Source: publisher figshare collection journal article supplement (https://asha.figshare.com/articles/dataset/_/23504325)
Supplement: Supplementary file 2 [file 2]

## Supplemental Material S1. Preliminary normative data for VASES.

The data contained within this document are preliminary norms of typical swallow function observed during flexible endoscopic evaluation of swallowing (FEES). Norms were interpreted using the Visual Analysis of Swallowing Efficiency and Safety (VASES), derived from 39 healthy, nondysphagic, community-dwelling adults. Demographic information of the 39 adults is listed below.

|                           | Total<br>( <i>N</i> = 39) |
|---------------------------|---------------------------|
| <b>Age (years)</b>        |                           |
| Mean ( <i>SD</i> )        | 50.2 (14.5)               |
| Median [Q1, Q3]           | 48.0 [40.5, 60.0]         |
| Min, Max                  | 27.0, 83.0                |
| <b>Height (inches)</b>    |                           |
| Mean ( <i>SD</i> )        | 67.2 (2.86)               |
| Median [Q1, Q3]           | 67.0 [65.0, 69.0]         |
| Min, Max                  | 62.0, 72.0                |
| <b>Weight (pounds)</b>    |                           |
| Mean ( <i>SD</i> )        | 161 (29.3)                |
| Median [Q1, Q3]           | 160 [140, 179]            |
| Min, Max                  | 110, 233                  |
| <b>Body Mass Index</b>    |                           |
| Mean ( <i>SD</i> )        | 25.1 (5.12)               |
| Median [Q1, Q3]           | 24.4 [21.3, 27.2]         |
| Min, Max                  | 18.5, 37.7                |
| <b>Sex</b>                |                           |
| Female                    | 20 (51.3%)                |
| Male                      | 19 (48.7%)                |
| <b>Gender</b>             |                           |
| Man                       | 19 (48.7%)                |
| Woman                     | 20 (51.3%)                |
| <b>Race/Ethnicity</b>     |                           |
| Asian                     | 1 (2.6%)                  |
| Black or African American | 10 (25.6%)                |
| Hispanic or Latino        | 5 (12.8%)                 |
| Multi-Racial              | 3 (7.7%)                  |
| White                     | 20 (51.3%)                |

## Functional Swallowing Outcomes of VASES

The primary functional swallowing outcomes of VASES include: six residue ratings, Penetration-Aspiration Scale (PAS), and bolus location at swallow onset. Details on each of these measures are described below. In addition to the primary VASES outcome measures, the number of swallows seen during the FEES were also recorded for each trial. Sip

size and bite size was also measured for each self-selected volume swallowing trial. For more detailed information on the rating methodology of VASES, see [\\_\\_\\_\\_\\_](#)

### **Residue Ratings**

Residue ratings are percentage-based visual-perceptual estimations of the amount of residue filling or covering each of VASES' six anatomic landmarks. Ratings typically range from 0-100%. Residue is considered 'absent' if 0% and 'present' if > 0%.

### **Penetration Aspiration Scale (PAS)**

The PAS is an 8-point scale used to judge the depth of and reaction to airway invasion. The 8-point PAS is summarized below. The original PAS publication can be found using the following link:

---

#### **Not Airway Invasion**

- **PAS 1.** No penetration or aspiration.

#### **Penetration**

- **PAS 2.** Material enters the laryngeal vestibule and is ejected entirely from the laryngeal vestibule.
- **PAS 3.** Material enters the laryngeal vestibule but is not ejected entirely from the laryngeal vestibule.
- **PAS 4.** Material enters the airway, contacts the vocal folds, and is ejected entirely from both the laryngeal vestibule and the vocal folds.
- **PAS 5.** Material enters the airway, contacts the vocal folds, but is not ejected entirely from either the laryngeal vestibule or the vocal folds.

#### **Aspiration**

- **PAS 6.** Material enters the vestibule, passes below the vocal folds and into the subglottis, but is ejected entirely from the subglottis.
  - Note: Material can be remaining on the vocal folds or in the laryngeal vestibule.
- **PAS 7.** Material enters the vestibule, passes below the vocal folds and into the subglottis, but is not ejected entirely from the subglottis despite effort
- **PAS 8.** Material enters the vestibule, passes below the vocal folds and into the subglottis, and is not ejected entirely from the subglottis with no attempt to eject being made.

### **Bolus location at swallow onset**

This refers to the location of the bolus at the onset of 'during the swallow', as defined by VASES. Trials were rated as present in the 'Oral Cavity Only' if no bolus was observed endoscopically at the onset of the swallow and nothing was observed in the pharynx or larynx. If boluses were endoscopically observed within the pharynx or larynx, then ratings of present or absent were provided for each of VASES six anatomic landmarks. Bolus location at swallow onset was not judged if the onset of the swallow was not observed due to camera obstruction.

### **Interpretation of VASES Norms for Clinical Use**

In practice, many clinicians use reference values (normative data) to categorize the extent to which a person's swallow performance is 'normal' or 'abnormal.' When data are normally distributed, it is common practice to use means and standard deviations as a method for estimating what is vs is not 'normal.' Data that are less than one standard deviation from the mean are commonly referred to as 'normal.' Data that are 1-2 standard deviations from the mean are commonly referred to as atypical. Data that are >2 standard deviations from the mean are commonly referred to as extremely unusual.

When data are not normally distributed (skewed), means and standard deviations should be avoided. Instead, skewed data should be interpreted using percentiles. In these instances, the median (50<sup>th</sup> percentile) is akin to the 'mean'. Data that are between the 25<sup>th</sup>-75<sup>th</sup> percentile range are commonly referred to as normal. Data that are within the 24<sup>th</sup>-5<sup>th</sup> or 76<sup>th</sup>-95<sup>th</sup> percentile ranges are commonly referred to as atypical. Data that are less than the 5<sup>th</sup> percentile or greater than the 95<sup>th</sup> percentile are commonly referred to as extremely unusual.

Using the above approach to interpret findings in clinical practice provides as a quick and convenient way to grossly describe a person's swallow performance. However, two important notes need to be emphasized when taking this approach. First, it is important to note that normality exists along a continuum. While using categories to describe how abnormal (i.e., atypical vs. extremely unusual) a swallow finding is common in clinical practice, the boundaries to develop such categorizations are arbitrary. Therefore, clinicians are encouraged to use categorical descriptors as soft guidelines rather than definitive diagnostic markers. Second, normative data are developed from samples of people which are used to apply to a larger population of people. However, the normative data may not reflect the *true* population normative data. Normative data are expected to become increasingly more accurate as normative data sample sizes increase. Therefore, clinicians should keep in mind that normative data may change as additional studies with larger sample sizes accumulate.

### **Standardized Swallowing Protocol**

Each participant completed the same standardized protocol involving 15 trials across 8 swallowing conditions (listed below). A 3.0 mm distal chip flexible laryngoscope was used with an LED light source that was white balanced before every examination. Water was used to lubricate the endoscope. No topical nasal anesthetics or decongestants were used. Participants were also asked to avoid talking throughout the exam, unless needing to express discomfort or concern. This was done in order to optimize temporal boundaries for VASES interpretation. Participants were encouraged to respond naturally with throat clears or coughs, as needed. Sips of clear water were used intermittently to clear residue from previous swallows and reduce gunking of the camera lens.

All boluses were self-administered, non-held, and non-cued. Instructions for each swallow condition were provided prior to bolus delivery to avoid any effect of verbal cueing. During 'natural' swallowing conditions, participants were asked to take a sip and "drink this like you normally would." During the 'single swallow' swallowing conditions, participants were asked to take a bite or sip and "swallow it in just one swallow – try not to do any extra swallows. Try to wait at least 5 seconds before doing a second or third swallow, so that we can see what you look like after just one swallow."

The self-selected volume of thin liquid via cup, natural, was given using an 8-ounce cup filled approximately with 130 mL of water. The self-selected volume of thin liquid via cup, single-swallow, was given using an 8-ounce cup filled approximately with 110 mL of water. The self-selected volume of saltine cracker, single-swallow, was given using a 3.10 gram saltine cracker.

All liquid swallowing conditions, except for the 90 mL liquid swallowing condition, were repeated twice: once with green opaque water with minimal-to-no coating effect, and once with white dyed water with maximal coating effect. The 90 mL was completed once, with white dyed water with maximal coating effect. The blue dyed pudding and non-dyed crackers were each repeated twice.

#### ***Swallow Conditions (click on below text to link to condition-specific normative data)***

- [All swallow conditions and trials](#)
- [Self-selected volume of thin liquid via cup, natural](#)
- [5 mL of thin liquid via cup, single swallow](#)
- [10 mL of thin liquid via cup, single swallow](#)
- [20 mL of thin liquid via cup, single swallow](#)
- [Self-selected volume of thin liquid via cup, single swallow](#)
- [90 mL of thin liquid via cup, uninterrupted sequential swallows](#)
- [5 mL, blue pudding via spoon, single swallow](#)
- [Self-selected volume of saltine cracker, single swallow](#)

## Descriptive Statistics of Across All Swallowing Trials

|                                                             | All Trials<br>(N = 584) |
|-------------------------------------------------------------|-------------------------|
| <b>Number of Swallows</b>                                   |                         |
| 1                                                           | 427 (73.1%)             |
| 2                                                           | 105 (18.0%)             |
| 3                                                           | 19 (3.3%)               |
| 4                                                           | 6 (1.0%)                |
| 5                                                           | 8 (1.4%)                |
| 6                                                           | 2 (0.3%)                |
| 7                                                           | 5 (0.9%)                |
| 8                                                           | 3 (0.5%)                |
| 9                                                           | 3 (0.5%)                |
| 11                                                          | 2 (0.3%)                |
| 13                                                          | 2 (0.3%)                |
| 14                                                          | 2 (0.3%)                |
| <b>Bolus Location at Swallow Onset: Oral Cavity Only</b>    |                         |
| Present                                                     | 319 (54.6%)             |
| Absent                                                      | 244 (41.8%)             |
| Missing                                                     | 21 (3.6%)               |
| <b>Bolus Location at Swallow Onset: Oropharynx</b>          |                         |
| Present                                                     | 229 (39.2%)             |
| Absent                                                      | 334 (57.2%)             |
| Missing                                                     | 21 (3.6%)               |
| <b>Bolus Location at Swallow Onset: Hypopharynx</b>         |                         |
| Present                                                     | 84 (14.4%)              |
| Absent                                                      | 477 (81.7%)             |
| Missing                                                     | 23 (3.9%)               |
| <b>Bolus Location at Swallow Onset: Epiglottis</b>          |                         |
| Present                                                     | 70 (12.0%)              |
| Absent                                                      | 493 (84.4%)             |
| Missing                                                     | 21 (3.6%)               |
| <b>Bolus Location at Swallow Onset: Laryngeal Vestibule</b> |                         |
| Present                                                     | 6 (1.0%)                |
| Absent                                                      | 557 (95.4%)             |
| Missing                                                     | 21 (3.6%)               |
| <b>Bolus Location at Swallow Onset: Vocal Folds</b>         |                         |
| Present                                                     | 1 (0.2%)                |
| Absent                                                      | 562 (96.2%)             |
| Missing                                                     | 21 (3.6%)               |

|                                                        | All Trials<br>(N = 584) |
|--------------------------------------------------------|-------------------------|
| <b>Bolus Location at Swallow Onset: Subglottis</b>     |                         |
| Absent                                                 | 563 (96.4%)             |
| Missing                                                | 21 (3.6%)               |
| <b>Oropharyngeal Residue: Present vs. Absent</b>       |                         |
| Absent                                                 | 34 (5.8%)               |
| Present                                                | 550 (94.2%)             |
| <b>Oropharyngeal Residue: Amount When Present</b>      |                         |
| Mean (SD)                                              | 3.06 (4.93)             |
| Median [Q1, Q3]                                        | 2.00 [1.50, 3.00]       |
| Percentiles: 1%, 2.5%, 5%, 10%                         | 1.00, 1.00, 1.00, 1.00  |
| Percentiles: 90%, 95%, 97.5%, 99%                      | 5.00, 7.00, 10.1, 16.0  |
| Min, Max                                               | 1.00, 89.0              |
| Missing                                                | 34 (5.8%)               |
| <b>Hypopharyngeal Residue: Present vs. Absent</b>      |                         |
| Absent                                                 | 78 (13.4%)              |
| Present                                                | 506 (86.6%)             |
| <b>Hypopharyngeal Residue: Amount When Present</b>     |                         |
| Mean (SD)                                              | 1.92 (3.01)             |
| Median [Q1, Q3]                                        | 1.50 [1.00, 2.00]       |
| Percentiles: 1%, 2.5%, 5%, 10%                         | 1.00, 1.00, 1.00, 1.00  |
| Percentiles: 90%, 95%, 97.5%, 99%                      | 3.00, 3.50, 4.00, 4.50  |
| Min, Max                                               | 1.00, 64.0              |
| Missing                                                | 78 (13.4%)              |
| <b>Epiglottic Residue: Present vs. Absent</b>          |                         |
| Absent                                                 | 204 (34.9%)             |
| Present                                                | 380 (65.1%)             |
| <b>Epiglottic Residue: Amount When Present</b>         |                         |
| Mean (SD)                                              | 6.41 (8.97)             |
| Median [Q1, Q3]                                        | 3.00 [2.00, 6.00]       |
| Percentiles: 1%, 2.5%, 5%, 10%                         | 1.00, 1.00, 1.00, 1.00  |
| Percentiles: 90%, 95%, 97.5%, 99%                      | 15.0, 25.1, 38.0, 42.8  |
| Min, Max                                               | 1.00, 70.0              |
| Missing                                                | 204 (34.9%)             |
| <b>Laryngeal Vestibule Residue: Present vs. Absent</b> |                         |
| Absent                                                 | 446 (76.4%)             |
| Present                                                | 138 (23.6%)             |

|                                                         | All Trials<br>(N = 584) |
|---------------------------------------------------------|-------------------------|
| <b>Laryngeal Vestibule Residue: Amount When Present</b> |                         |
| Mean (SD)                                               | 5.32 (7.74)             |
| Median [Q1, Q3]                                         | 3.00 [2.00, 4.50]       |
| Percentiles: 1%, 2.5%, 5%, 10%                          | 1.00, 1.00, 1.00, 1.00  |
| Percentiles: 90%, 95%, 97.5%, 99%                       | 11.3, 18.9, 34.2, 39.6  |
| Min, Max                                                | 0.500, 42.0             |
| Missing                                                 | 446 (76.4%)             |
| <b>Vocal Fold Residue: Present vs. Absent</b>           |                         |
| Absent                                                  | 555 (95.0%)             |
| Present                                                 | 29 (5.0%)               |
| <b>Vocal Fold Residue: Amount When Present</b>          |                         |
| Mean (SD)                                               | 10.0 (15.9)             |
| Median [Q1, Q3]                                         | 3.50 [2.50, 7.00]       |
| Percentiles: 1%, 2.5%, 5%, 10%                          | 1.00, 1.00, 1.00, 1.40  |
| Percentiles: 90%, 95%, 97.5%, 99%                       | 33.6, 49.0, 56.5, 58.6  |
| Min, Max                                                | 1.00, 60.0              |
| Missing                                                 | 555 (95.0%)             |
| <b>Subglottic Residue: Present vs. Absent</b>           |                         |
| Absent                                                  | 579 (99.1%)             |
| Present                                                 | 5 (0.9%)                |
| <b>Subglottic Residue: Amount When Present</b>          |                         |
| Mean (SD)                                               | 25.6 (37.1)             |
| Median [Q1, Q3]                                         | 10.0 [3.00, 24.0]       |
| Percentiles: 1%, 2.5%, 5%, 10%                          | 1.08, 1.20, 1.40, 1.80  |
| Percentiles: 90%, 95%, 97.5%, 99%                       | 63.6, 76.8, 83.4, 87.4  |
| Min, Max                                                | 1.00, 90.0              |
| Missing                                                 | 579 (99.1%)             |
| <b>PAS</b>                                              |                         |
| 1                                                       | 440 (75.3%)             |
| 2                                                       | 4 (0.7%)                |
| 3                                                       | 110 (18.8%)             |
| 4                                                       | 0 (0%)                  |
| 5                                                       | 25 (4.3%)               |
| 6                                                       | 0 (0%)                  |
| 7                                                       | 3 (0.5%)                |
| 8                                                       | 2 (0.3%)                |

**Swallow Condition: Self-Selected Volume of Thin Liquid via Cup, Natural**

|                                                             | <b>Green opaque<br/>(N = 39)</b> | <b>White coating<br/>(N = 39)</b> |
|-------------------------------------------------------------|----------------------------------|-----------------------------------|
| <b>Sip/Bite Size</b>                                        |                                  |                                   |
| Mean (SD)                                                   | 19.1 (8.75)                      | 22.3 (12.3)                       |
| Median [Q1, Q3]                                             | 18.0 [12.5, 23.0]                | 20.0 [14.0, 26.0]                 |
| Percentiles: 1%, 2.5%, 5%, 10%                              | 5.76, 6.90, 8.80, 9.00           | 6.38, 6.95, 9.70, 12.0            |
| Percentiles: 90%, 95%, 97.5%, 99%                           | 33.2, 36.1, 37.3, 40.1           | 34.6, 43.8, 51.9, 62.2            |
| Min, Max                                                    | 5.00, 42.0                       | 6.00, 69.0                        |
| <b>Number of Swallows</b>                                   |                                  |                                   |
| 1                                                           | 23 (59.0%)                       | 24 (61.5%)                        |
| 2                                                           | 14 (35.9%)                       | 12 (30.8%)                        |
| 3                                                           | 2 (5.1%)                         | 3 (7.7%)                          |
| <b>Bolus Location at Swallow Onset: Oral Cavity Only</b>    |                                  |                                   |
| Present                                                     | 20 (51.3%)                       | 26 (66.7%)                        |
| Absent                                                      | 16 (41.0%)                       | 11 (28.2%)                        |
| Missing                                                     | 3 (7.7%)                         | 2 (5.1%)                          |
| <b>Bolus Location at Swallow Onset: Oropharynx</b>          |                                  |                                   |
| Present                                                     | 14 (35.9%)                       | 9 (23.1%)                         |
| Absent                                                      | 22 (56.4%)                       | 28 (71.8%)                        |
| Missing                                                     | 3 (7.7%)                         | 2 (5.1%)                          |
| <b>Bolus Location at Swallow Onset: Hypopharynx</b>         |                                  |                                   |
| Present                                                     | 10 (25.6%)                       | 7 (17.9%)                         |
| Absent                                                      | 26 (66.7%)                       | 30 (76.9%)                        |
| Missing                                                     | 3 (7.7%)                         | 2 (5.1%)                          |
| <b>Bolus Location at Swallow Onset: Epiglottis</b>          |                                  |                                   |
| Present                                                     | 8 (20.5%)                        | 3 (7.7%)                          |
| Absent                                                      | 28 (71.8%)                       | 34 (87.2%)                        |
| Missing                                                     | 3 (7.7%)                         | 2 (5.1%)                          |
| <b>Bolus Location at Swallow Onset: Laryngeal Vestibule</b> |                                  |                                   |
| Present                                                     | 1 (2.6%)                         | 0 (0%)                            |
| Absent                                                      | 35 (89.7%)                       | 37 (94.9%)                        |
| Missing                                                     | 3 (7.7%)                         | 2 (5.1%)                          |
| <b>Bolus Location at Swallow Onset: Vocal Folds</b>         |                                  |                                   |
| Present                                                     | 0 (0%)                           | 0 (0%)                            |
| Absent                                                      | 36 (92.3%)                       | 37 (94.9%)                        |
| Missing                                                     | 3 (7.7%)                         | 2 (5.1%)                          |
| <b>Bolus Location at Swallow Onset: Subglottis</b>          |                                  |                                   |
| Absent                                                      | 36 (92.3%)                       | 37 (94.9%)                        |
| Missing                                                     | 3 (7.7%)                         | 2 (5.1%)                          |

|                                                         | Green opaque<br>( <i>N</i> = 39) | White coating<br>( <i>N</i> = 39) |
|---------------------------------------------------------|----------------------------------|-----------------------------------|
| <b>Oropharyngeal Residue: Present vs. Absent</b>        |                                  |                                   |
| Absent                                                  | 1 (2.6%)                         | 0 (0%)                            |
| Present                                                 | 38 (97.4%)                       | 39 (100%)                         |
| <b>Oropharyngeal Residue: Amount When Present</b>       |                                  |                                   |
| Mean ( <i>SD</i> )                                      | 2.38 (1.85)                      | 2.65 (3.61)                       |
| Median [Q1, Q3]                                         | 1.75 [1.00, 2.88]                | 2.00 [1.50, 2.00]                 |
| Percentiles: 1%, 2.5%, 5%, 10%                          | 1.00, 1.00, 1.00, 1.00           | 1.00, 1.00, 1.00, 1.00            |
| Percentiles: 90%, 95%, 97.5%, 99%                       | 4.30, 6.58, 7.15, 8.26           | 4.30, 6.05, 7.33, 16.7            |
| Min, Max                                                | 1.00, 9.00                       | 1.00, 23.0                        |
| Missing                                                 | 1 (2.6%)                         | 0 (0%)                            |
| <b>Hypopharyngeal Residue: Present vs. Absent</b>       |                                  |                                   |
| Absent                                                  | 2 (5.1%)                         | 0 (0%)                            |
| Present                                                 | 37 (94.9%)                       | 39 (100%)                         |
| <b>Hypopharyngeal Residue: Amount When Present</b>      |                                  |                                   |
| Mean ( <i>SD</i> )                                      | 1.49 (0.571)                     | 1.69 (0.749)                      |
| Median [Q1, Q3]                                         | 1.50 [1.00, 2.00]                | 1.50 [1.00, 2.00]                 |
| Percentiles: 1%, 2.5%, 5%, 10%                          | 1.00, 1.00, 1.00, 1.00           | 1.00, 1.00, 1.00, 1.00            |
| Percentiles: 90%, 95%, 97.5%, 99%                       | 2.20, 2.50, 2.55, 2.82           | 3.00, 3.00, 3.05, 3.62            |
| Min, Max                                                | 1.00, 3.00                       | 1.00, 4.00                        |
| Missing                                                 | 2 (5.1%)                         | 0 (0%)                            |
| <b>Epiglottic Residue: Present vs. Absent</b>           |                                  |                                   |
| Absent                                                  | 15 (38.5%)                       | 2 (5.1%)                          |
| Present                                                 | 24 (61.5%)                       | 37 (94.9%)                        |
| <b>Epiglottic Residue: Amount When Present</b>          |                                  |                                   |
| Mean ( <i>SD</i> )                                      | 5.29 (7.92)                      | 6.01 (8.52)                       |
| Median [Q1, Q3]                                         | 2.50 [2.00, 4.63]                | 3.00 [1.50, 5.00]                 |
| Percentiles: 1%, 2.5%, 5%, 10%                          | 1.00, 1.00, 1.00, 1.15           | 1.00, 1.00, 1.00, 1.00            |
| Percentiles: 90%, 95%, 97.5%, 99%                       | 9.40, 16.8, 26.5, 33.4           | 14.8, 25.4, 28.4, 36.0            |
| Min, Max                                                | 1.00, 38.0                       | 1.00, 41.0                        |
| Missing                                                 | 15 (38.5%)                       | 2 (5.1%)                          |
| <b>Laryngeal Vestibule Residue: Present vs. Absent</b>  |                                  |                                   |
| Absent                                                  | 27 (69.2%)                       | 26 (66.7%)                        |
| Present                                                 | 12 (30.8%)                       | 13 (33.3%)                        |
| <b>Laryngeal Vestibule Residue: Amount When Present</b> |                                  |                                   |
| Mean ( <i>SD</i> )                                      | 2.71 (1.44)                      | 6.65 (10.2)                       |
| Median [Q1, Q3]                                         | 2.00 [2.00, 2.63]                | 2.50 [2.00, 7.00]                 |
| Percentiles: 1%, 2.5%, 5%, 10%                          | 2.00, 2.00, 2.00, 2.00           | 1.00, 1.00, 1.00, 1.20            |



|                                                | Green opaque<br>( <i>N</i> = 39) | White coating<br>( <i>N</i> = 39) |
|------------------------------------------------|----------------------------------|-----------------------------------|
| Percentiles: 90%, 95%, 97.5%, 99%              | 3.45, 5.08, 6.04, 6.62           | 11.1, 22.8, 30.9, 35.8            |
| Min, Max                                       | 2.00, 7.00                       | 1.00, 39.0                        |
| Missing                                        | 27 (69.2%)                       | 26 (66.7%)                        |
| <b>Vocal Fold Residue: Present vs. Absent</b>  |                                  |                                   |
| Absent                                         | 38 (97.4%)                       | 36 (92.3%)                        |
| Present                                        | 1 (2.6%)                         | 3 (7.7%)                          |
| <b>Vocal Fold Residue: Amount When Present</b> |                                  |                                   |
| Mean ( <i>SD</i> )                             | NA                               | 2.17 (0.764)                      |
| Median [Q1, Q3]                                | 4.00 [4.00, 4.00]                | 2.00 [1.75, 2.50]                 |
| Percentiles: 1%, 2.5%, 5%, 10%                 | 4.00, 4.00, 4.00, 4.00           | 1.51, 1.53, 1.55, 1.60            |
| Percentiles: 90%, 95%, 97.5%, 99%              | 4.00, 4.00, 4.00, 4.00           | 2.80, 2.90, 2.95, 2.98            |
| Min, Max                                       | 4.00, 4.00                       | 1.50, 3.00                        |
| Missing                                        | 38 (97.4%)                       | 36 (92.3%)                        |
| <b>Subglottic Residue: Present vs. Absent</b>  |                                  |                                   |
| Absent                                         | 39 (100%)                        | 39 (100%)                         |
| <b>Subglottic Residue: Amount When Present</b> |                                  |                                   |
| Mean ( <i>SD</i> )                             | NA                               | NA                                |
| Median [Q1, Q3]                                | NA                               | NA                                |
| Percentiles: 1%, 2.5%, 5%, 10%                 | NA                               | NA                                |
| Percentiles: 90%, 95%, 97.5%, 99%              | NA                               | NA                                |
| Min, Max                                       | NA                               | NA                                |
| Missing                                        | 39 (100%)                        | 39 (100%)                         |
| <b>PAS</b>                                     |                                  |                                   |
| 1                                              | 26 (66.7%)                       | 26 (66.7%)                        |
| 2                                              | 1 (2.6%)                         | 0 (0%)                            |
| 3                                              | 10 (25.6%)                       | 10 (25.6%)                        |
| 4                                              | 0 (0%)                           | 0 (0%)                            |
| 5                                              | 2 (5.1%)                         | 3 (7.7%)                          |
| 6                                              | 0 (0%)                           | 0 (0%)                            |
| 7                                              | 0 (0%)                           | 0 (0%)                            |
| 8                                              | 0 (0%)                           | 0 (0%)                            |

**Swallow Condition: 5 mL Thin Liquid via Cup, Single Swallow**

|                                                             | <b>Green opaque<br/>(N = 39)</b> | <b>White coating<br/>(N = 39)</b> |
|-------------------------------------------------------------|----------------------------------|-----------------------------------|
| <b>Number of Swallows</b>                                   |                                  |                                   |
| 1                                                           | 34 (87.2%)                       | 37 (94.9%)                        |
| 2                                                           | 4 (10.3%)                        | 2 (5.1%)                          |
| 3                                                           | 1 (2.6%)                         | 0 (0%)                            |
| <b>Bolus Location at Swallow Onset: Oral Cavity Only</b>    |                                  |                                   |
| Present                                                     | 20 (51.3%)                       | 24 (61.5%)                        |
| Absent                                                      | 18 (46.2%)                       | 12 (30.8%)                        |
| Missing                                                     | 1 (2.6%)                         | 3 (7.7%)                          |
| <b>Bolus Location at Swallow Onset: Oropharynx</b>          |                                  |                                   |
| Present                                                     | 17 (43.6%)                       | 11 (28.2%)                        |
| Absent                                                      | 21 (53.8%)                       | 25 (64.1%)                        |
| Missing                                                     | 1 (2.6%)                         | 3 (7.7%)                          |
| <b>Bolus Location at Swallow Onset: Hypopharynx</b>         |                                  |                                   |
| Present                                                     | 8 (20.5%)                        | 4 (10.3%)                         |
| Absent                                                      | 30 (76.9%)                       | 32 (82.1%)                        |
| Missing                                                     | 1 (2.6%)                         | 3 (7.7%)                          |
| <b>Bolus Location at Swallow Onset: Epiglottis</b>          |                                  |                                   |
| Present                                                     | 6 (15.4%)                        | 2 (5.1%)                          |
| Absent                                                      | 32 (82.1%)                       | 34 (87.2%)                        |
| Missing                                                     | 1 (2.6%)                         | 3 (7.7%)                          |
| <b>Bolus Location at Swallow Onset: Laryngeal Vestibule</b> |                                  |                                   |
| Present                                                     | 1 (2.6%)                         | 0 (0%)                            |
| Absent                                                      | 37 (94.9%)                       | 36 (92.3%)                        |
| Missing                                                     | 1 (2.6%)                         | 3 (7.7%)                          |
| <b>Bolus Location at Swallow Onset: Vocal Folds</b>         |                                  |                                   |
| Present                                                     | 0 (0%)                           | 0 (0%)                            |
| Absent                                                      | 38 (97.4%)                       | 36 (92.3%)                        |
| Missing                                                     | 1 (2.6%)                         | 3 (7.7%)                          |
| <b>Bolus Location at Swallow Onset: Subglottis</b>          |                                  |                                   |
| Absent                                                      | 38 (97.4%)                       | 36 (92.3%)                        |
| Missing                                                     | 1 (2.6%)                         | 3 (7.7%)                          |
| <b>Oropharyngeal Residue: Present vs. Absent</b>            |                                  |                                   |
| Absent                                                      | 1 (2.6%)                         | 0 (0%)                            |
| Present                                                     | 38 (97.4%)                       | 39 (100%)                         |
| <b>Oropharyngeal Residue: Amount When Present</b>           |                                  |                                   |
| Mean (SD)                                                   | 2.11 (1.06)                      | 2.19 (1.31)                       |
| Median [Q1, Q3]                                             | 2.00 [1.50, 2.50]                | 2.00 [1.50, 2.50]                 |

|                                                         | Green opaque<br>( <i>N</i> = 39) | White coating<br>( <i>N</i> = 39) |
|---------------------------------------------------------|----------------------------------|-----------------------------------|
| Percentiles: 1%, 2.5%, 5%, 10%                          | 1.00, 1.00, 1.00, 1.00           | 1.00, 1.00, 1.00, 1.00            |
| Percentiles: 90%, 95%, 97.5%, 99%                       | 4.00, 4.00, 4.08, 4.63           | 3.00, 4.05, 4.70, 6.98            |
| Min, Max                                                | 1.00, 5.00                       | 1.00, 8.50                        |
| Missing                                                 | 1 (2.6%)                         | 0 (0%)                            |
| <b>Hypopharyngeal Residue: Present vs. Absent</b>       |                                  |                                   |
| Absent                                                  | 4 (10.3%)                        | 0 (0%)                            |
| Present                                                 | 35 (89.7%)                       | 39 (100%)                         |
| <b>Hypopharyngeal Residue: Amount When Present</b>      |                                  |                                   |
| Mean ( <i>SD</i> )                                      | 1.69 (0.814)                     | 1.67 (0.691)                      |
| Median [Q1, Q3]                                         | 1.50 [1.00, 2.00]                | 1.50 [1.00, 2.00]                 |
| Percentiles: 1%, 2.5%, 5%, 10%                          | 1.00, 1.00, 1.00, 1.00           | 1.00, 1.00, 1.00, 1.00            |
| Percentiles: 90%, 95%, 97.5%, 99%                       | 2.80, 3.50, 3.58, 3.83           | 3.00, 3.00, 3.00, 3.00            |
| Min, Max                                                | 1.00, 4.00                       | 1.00, 3.00                        |
| Missing                                                 | 4 (10.3%)                        | 0 (0%)                            |
| <b>Epiglottic Residue: Present vs. Absent</b>           |                                  |                                   |
| Absent                                                  | 20 (51.3%)                       | 0 (0%)                            |
| Present                                                 | 19 (48.7%)                       | 39 (100%)                         |
| <b>Epiglottic Residue: Amount When Present</b>          |                                  |                                   |
| Mean ( <i>SD</i> )                                      | 3.61 (2.71)                      | 4.95 (6.87)                       |
| Median [Q1, Q3]                                         | 2.00 [2.00, 5.25]                | 2.00 [1.50, 4.50]                 |
| Percentiles: 1%, 2.5%, 5%, 10%                          | 1.00, 1.00, 1.00, 1.00           | 1.00, 1.00, 1.00, 1.00            |
| Percentiles: 90%, 95%, 97.5%, 99%                       | 7.00, 7.40, 9.20, 10.3           | 14.0, 19.7, 21.6, 27.8            |
| Min, Max                                                | 1.00, 11.0                       | 1.00, 32.0                        |
| Missing                                                 | 20 (51.3%)                       | 0 (0%)                            |
| <b>Laryngeal Vestibule Residue: Present vs. Absent</b>  |                                  |                                   |
| Absent                                                  | 35 (89.7%)                       | 31 (79.5%)                        |
| Present                                                 | 4 (10.3%)                        | 8 (20.5%)                         |
| <b>Laryngeal Vestibule Residue: Amount When Present</b> |                                  |                                   |
| Mean ( <i>SD</i> )                                      | 4.63 (2.56)                      | 4.00 (5.40)                       |
| Median [Q1, Q3]                                         | 5.25 [4.00, 5.88]                | 2.00 [1.00, 4.00]                 |
| Percentiles: 1%, 2.5%, 5%, 10%                          | 1.12, 1.30, 1.60, 2.20           | 1.00, 1.00, 1.00, 1.00            |
| Percentiles: 90%, 95%, 97.5%, 99%                       | 6.55, 6.78, 6.89, 6.96           | 7.90, 12.5, 14.7, 16.1            |
| Min, Max                                                | 1.00, 7.00                       | 1.00, 17.0                        |
| Missing                                                 | 35 (89.7%)                       | 31 (79.5%)                        |
| <b>Vocal Fold Residue: Present vs. Absent</b>           |                                  |                                   |
| Absent                                                  | 39 (100%)                        | 39 (100%)                         |

|                                                | Green opaque<br>( <i>N</i> = 39) | White coating<br>( <i>N</i> = 39) |
|------------------------------------------------|----------------------------------|-----------------------------------|
| <b>Vocal Fold Residue: Amount When Present</b> |                                  |                                   |
| Mean ( <i>SD</i> )                             | NA                               | NA                                |
| Median [Q1, Q3]                                | NA                               | NA                                |
| Percentiles: 1%, 2.5%, 5%, 10%                 | NA                               | NA                                |
| Percentiles: 90%, 95%, 97.5%, 99%              | NA                               | NA                                |
| Min, Max                                       | NA                               | NA                                |
| Missing                                        | 39 (100%)                        | 39 (100%)                         |
| <b>Subglottic Residue: Present vs. Absent</b>  |                                  |                                   |
| Absent                                         | 39 (100%)                        | 39 (100%)                         |
| <b>Subglottic Residue: Amount When Present</b> |                                  |                                   |
| Mean ( <i>SD</i> )                             | NA                               | NA                                |
| Median [Q1, Q3]                                | NA                               | NA                                |
| Percentiles: 1%, 2.5%, 5%, 10%                 | NA                               | NA                                |
| Percentiles: 90%, 95%, 97.5%, 99%              | NA                               | NA                                |
| Min, Max                                       | NA                               | NA                                |
| Missing                                        | 39 (100%)                        | 39 (100%)                         |
| <b>PAS</b>                                     |                                  |                                   |
| 1                                              | 35 (89.7%)                       | 31 (79.5%)                        |
| 2                                              | 0 (0%)                           | 0 (0%)                            |
| 3                                              | 4 (10.3%)                        | 8 (20.5%)                         |
| 4                                              | 0 (0%)                           | 0 (0%)                            |
| 5                                              | 0 (0%)                           | 0 (0%)                            |
| 6                                              | 0 (0%)                           | 0 (0%)                            |
| 7                                              | 0 (0%)                           | 0 (0%)                            |
| 8                                              | 0 (0%)                           | 0 (0%)                            |

**Swallow Condition: 10 mL Thin Liquid via Cup, Single Swallow**

|                                                             | <b>Green opaque<br/>(N = 39)</b> | <b>White coating<br/>(N = 39)</b> |
|-------------------------------------------------------------|----------------------------------|-----------------------------------|
| <b>Number of Swallows</b>                                   |                                  |                                   |
| 1                                                           | 30 (76.9%)                       | 33 (84.6%)                        |
| 2                                                           | 8 (20.5%)                        | 6 (15.4%)                         |
| 3                                                           | 1 (2.6%)                         | 0 (0%)                            |
| <b>Bolus Location at Swallow Onset: Oral Cavity Only</b>    |                                  |                                   |
| Present                                                     | 21 (53.8%)                       | 21 (53.8%)                        |
| Absent                                                      | 17 (43.6%)                       | 17 (43.6%)                        |
| Missing                                                     | 1 (2.6%)                         | 1 (2.6%)                          |
| <b>Bolus Location at Swallow Onset: Oropharynx</b>          |                                  |                                   |
| Present                                                     | 16 (41.0%)                       | 16 (41.0%)                        |
| Absent                                                      | 22 (56.4%)                       | 22 (56.4%)                        |
| Missing                                                     | 1 (2.6%)                         | 1 (2.6%)                          |
| <b>Bolus Location at Swallow Onset: Hypopharynx</b>         |                                  |                                   |
| Present                                                     | 7 (17.9%)                        | 8 (20.5%)                         |
| Absent                                                      | 31 (79.5%)                       | 30 (76.9%)                        |
| Missing                                                     | 1 (2.6%)                         | 1 (2.6%)                          |
| <b>Bolus Location at Swallow Onset: Epiglottis</b>          |                                  |                                   |
| Present                                                     | 4 (10.3%)                        | 4 (10.3%)                         |
| Absent                                                      | 34 (87.2%)                       | 34 (87.2%)                        |
| Missing                                                     | 1 (2.6%)                         | 1 (2.6%)                          |
| <b>Bolus Location at Swallow Onset: Laryngeal Vestibule</b> |                                  |                                   |
| Present                                                     | 1 (2.6%)                         | 0 (0%)                            |
| Absent                                                      | 37 (94.9%)                       | 38 (97.4%)                        |
| Missing                                                     | 1 (2.6%)                         | 1 (2.6%)                          |
| <b>Bolus Location at Swallow Onset: Vocal Folds</b>         |                                  |                                   |
| Present                                                     | 0 (0%)                           | 0 (0%)                            |
| Absent                                                      | 38 (97.4%)                       | 38 (97.4%)                        |
| Missing                                                     | 1 (2.6%)                         | 1 (2.6%)                          |
| <b>Bolus Location at Swallow Onset: Subglottis</b>          |                                  |                                   |
| Absent                                                      | 38 (97.4%)                       | 38 (97.4%)                        |
| Missing                                                     | 1 (2.6%)                         | 1 (2.6%)                          |
| <b>Oropharyngeal Residue: Present vs. Absent</b>            |                                  |                                   |
| Absent                                                      | 2 (5.1%)                         | 1 (2.6%)                          |
| Present                                                     | 37 (94.9%)                       | 38 (97.4%)                        |
| <b>Oropharyngeal Residue: Amount When Present</b>           |                                  |                                   |
| Mean (SD)                                                   | 2.14 (0.991)                     | 2.53 (1.38)                       |
| Median [Q1, Q3]                                             | 2.00 [1.50, 3.00]                | 2.00 [1.50, 3.00]                 |

|                                                         | <b>Green opaque<br/>(N = 39)</b> | <b>White coating<br/>(N = 39)</b> |
|---------------------------------------------------------|----------------------------------|-----------------------------------|
| Percentiles: 1%, 2.5%, 5%, 10%                          | 1.00, 1.00, 1.00, 1.00           | 1.00, 1.00, 1.00, 1.00            |
| Percentiles: 90%, 95%, 97.5%, 99%                       | 3.20, 3.70, 4.55, 4.82           | 5.00, 5.15, 6.00, 6.00            |
| Min, Max                                                | 1.00, 5.00                       | 1.00, 6.00                        |
| Missing                                                 | 2 (5.1%)                         | 1 (2.6%)                          |
| <b>Hypopharyngeal Residue: Present vs. Absent</b>       |                                  |                                   |
| Absent                                                  | 4 (10.3%)                        | 1 (2.6%)                          |
| Present                                                 | 35 (89.7%)                       | 38 (97.4%)                        |
| <b>Hypopharyngeal Residue: Amount When Present</b>      |                                  |                                   |
| Mean (SD)                                               | 1.74 (0.965)                     | 1.87 (0.852)                      |
| Median [Q1, Q3]                                         | 1.50 [1.00, 2.00]                | 2.00 [1.00, 2.00]                 |
| Percentiles: 1%, 2.5%, 5%, 10%                          | 1.00, 1.00, 1.00, 1.00           | 1.00, 1.00, 1.00, 1.00            |
| Percentiles: 90%, 95%, 97.5%, 99%                       | 3.30, 4.00, 4.00, 4.00           | 2.65, 4.00, 4.04, 4.32            |
| Min, Max                                                | 1.00, 4.00                       | 1.00, 4.50                        |
| Missing                                                 | 4 (10.3%)                        | 1 (2.6%)                          |
| <b>Epiglottic Residue: Present vs. Absent</b>           |                                  |                                   |
| Absent                                                  | 17 (43.6%)                       | 4 (10.3%)                         |
| Present                                                 | 22 (56.4%)                       | 35 (89.7%)                        |
| <b>Epiglottic Residue: Amount When Present</b>          |                                  |                                   |
| Mean (SD)                                               | 3.70 (2.95)                      | 7.30 (8.95)                       |
| Median [Q1, Q3]                                         | 3.00 [2.63, 4.00]                | 4.00 [2.00, 8.00]                 |
| Percentiles: 1%, 2.5%, 5%, 10%                          | 1.00, 1.00, 1.00, 1.00           | 1.00, 1.00, 1.00, 1.20            |
| Percentiles: 90%, 95%, 97.5%, 99%                       | 5.90, 6.95, 10.8, 13.3           | 15.3, 26.8, 32.5, 37.6            |
| Min, Max                                                | 1.00, 15.0                       | 1.00, 41.0                        |
| Missing                                                 | 17 (43.6%)                       | 4 (10.3%)                         |
| <b>Laryngeal Vestibule Residue: Present vs. Absent</b>  |                                  |                                   |
| Absent                                                  | 30 (76.9%)                       | 23 (59.0%)                        |
| Present                                                 | 9 (23.1%)                        | 16 (41.0%)                        |
| <b>Laryngeal Vestibule Residue: Amount When Present</b> |                                  |                                   |
| Mean (SD)                                               | 3.22 (3.02)                      | 2.91 (2.03)                       |
| Median [Q1, Q3]                                         | 2.00 [2.00, 3.00]                | 2.50 [1.50, 3.13]                 |
| Percentiles: 1%, 2.5%, 5%, 10%                          | 1.50, 1.50, 1.50, 1.50           | 1.00, 1.00, 1.00, 1.00            |
| Percentiles: 90%, 95%, 97.5%, 99%                       | 5.40, 8.20, 9.60, 10.4           | 5.50, 7.25, 7.63, 7.85            |
| Min, Max                                                | 1.50, 11.0                       | 1.00, 8.00                        |
| Missing                                                 | 30 (76.9%)                       | 23 (59.0%)                        |
| <b>Vocal Fold Residue: Present vs. Absent</b>           |                                  |                                   |
| Absent                                                  | 36 (92.3%)                       | 36 (92.3%)                        |
| Present                                                 | 3 (7.7%)                         | 3 (7.7%)                          |

|                                                | Green opaque<br>( <i>N</i> = 39) | White coating<br>( <i>N</i> = 39) |
|------------------------------------------------|----------------------------------|-----------------------------------|
| <b>Vocal Fold Residue: Amount When Present</b> |                                  |                                   |
| Mean (SD)                                      | 3.17 (0.764)                     | 21.3 (33.5)                       |
| Median [Q1, Q3]                                | 3.00 [2.75, 3.50]                | 3.00 [2.00, 31.5]                 |
| Percentiles: 1%, 2.5%, 5%, 10%                 | 2.51, 2.53, 2.55, 2.60           | 1.04, 1.10, 1.20, 1.40            |
| Percentiles: 90%, 95%, 97.5%, 99%              | 3.80, 3.90, 3.95, 3.98           | 48.6, 54.3, 57.2, 58.9            |
| Min, Max                                       | 2.50, 4.00                       | 1.00, 60.0                        |
| Missing                                        | 36 (92.3%)                       | 36 (92.3%)                        |
| <b>Subglottic Residue: Present vs. Absent</b>  |                                  |                                   |
| Absent                                         | 39 (100%)                        | 38 (97.4%)                        |
| Present                                        | 0 (0%)                           | 1 (2.6%)                          |
| <b>Subglottic Residue: Amount When Present</b> |                                  |                                   |
| Mean (SD)                                      | NA                               | NA                                |
| Median [Q1, Q3]                                | NA                               | 90.0 [90.0, 90.0]                 |
| Percentiles: 1%, 2.5%, 5%, 10%                 | NA                               | 90.0, 90.0, 90.0, 90.0            |
| Percentiles: 90%, 95%, 97.5%, 99%              | NA                               | 90.0, 90.0, 90.0, 90.0            |
| Min, Max                                       | NA                               | 90.0, 90.0                        |
| Missing                                        | 39 (100%)                        | 38 (97.4%)                        |
| <b>PAS</b>                                     |                                  |                                   |
| 1                                              | 30 (76.9%)                       | 23 (59.0%)                        |
| 2                                              | 0 (0%)                           | 0 (0%)                            |
| 3                                              | 6 (15.4%)                        | 13 (33.3%)                        |
| 4                                              | 0 (0%)                           | 0 (0%)                            |
| 5                                              | 3 (7.7%)                         | 2 (5.1%)                          |
| 6                                              | 0 (0%)                           | 0 (0%)                            |
| 7                                              | 0 (0%)                           | 1 (2.6%)                          |
| 8                                              | 0 (0%)                           | 0 (0%)                            |

**Swallow Condition: 20 mL Thin Liquid via Cup, Single Swallow**

|                                                             | <b>Green opaque<br/>(N = 39)</b> | <b>White coating<br/>(N = 39)</b> |
|-------------------------------------------------------------|----------------------------------|-----------------------------------|
| <b>Number of Swallows</b>                                   |                                  |                                   |
| 1                                                           | 28 (71.8%)                       | 26 (66.7%)                        |
| 2                                                           | 8 (20.5%)                        | 11 (28.2%)                        |
| 3                                                           | 3 (7.7%)                         | 2 (5.1%)                          |
| <b>Bolus Location at Swallow Onset: Oral Cavity Only</b>    |                                  |                                   |
| Present                                                     | 24 (61.5%)                       | 22 (56.4%)                        |
| Absent                                                      | 14 (35.9%)                       | 15 (38.5%)                        |
| Missing                                                     | 1 (2.6%)                         | 2 (5.1%)                          |
| <b>Bolus Location at Swallow Onset: Oropharynx</b>          |                                  |                                   |
| Present                                                     | 13 (33.3%)                       | 14 (35.9%)                        |
| Absent                                                      | 25 (64.1%)                       | 23 (59.0%)                        |
| Missing                                                     | 1 (2.6%)                         | 2 (5.1%)                          |
| <b>Bolus Location at Swallow Onset: Hypopharynx</b>         |                                  |                                   |
| Present                                                     | 6 (15.4%)                        | 6 (15.4%)                         |
| Absent                                                      | 32 (82.1%)                       | 31 (79.5%)                        |
| Missing                                                     | 1 (2.6%)                         | 2 (5.1%)                          |
| <b>Bolus Location at Swallow Onset: Epiglottis</b>          |                                  |                                   |
| Present                                                     | 4 (10.3%)                        | 5 (12.8%)                         |
| Absent                                                      | 34 (87.2%)                       | 32 (82.1%)                        |
| Missing                                                     | 1 (2.6%)                         | 2 (5.1%)                          |
| <b>Bolus Location at Swallow Onset: Laryngeal Vestibule</b> |                                  |                                   |
| Present                                                     | 0 (0%)                           | 1 (2.6%)                          |
| Absent                                                      | 38 (97.4%)                       | 36 (92.3%)                        |
| Missing                                                     | 1 (2.6%)                         | 2 (5.1%)                          |
| <b>Bolus Location at Swallow Onset: Vocal Folds</b>         |                                  |                                   |
| Present                                                     | 0 (0%)                           | 1 (2.6%)                          |
| Absent                                                      | 38 (97.4%)                       | 36 (92.3%)                        |
| Missing                                                     | 1 (2.6%)                         | 2 (5.1%)                          |
| <b>Bolus Location at Swallow Onset: Subglottis</b>          |                                  |                                   |
| Absent                                                      | 38 (97.4%)                       | 37 (94.9%)                        |
| Missing                                                     | 1 (2.6%)                         | 2 (5.1%)                          |
| <b>Oropharyngeal Residue: Present vs. Absent</b>            |                                  |                                   |
| Absent                                                      | 1 (2.6%)                         | 0 (0%)                            |
| Present                                                     | 38 (97.4%)                       | 39 (100%)                         |
| <b>Oropharyngeal Residue: Amount When Present</b>           |                                  |                                   |
| Mean (SD)                                                   | 3.09 (2.08)                      | 3.18 (3.47)                       |
| Median [Q1, Q3]                                             | 2.50 [2.00, 3.88]                | 2.00 [1.50, 3.00]                 |



|                                                         | Green opaque<br>( <i>N</i> = 39) | White coating<br>( <i>N</i> = 39) |
|---------------------------------------------------------|----------------------------------|-----------------------------------|
| Percentiles: 1%, 2.5%, 5%, 10%                          | 1.00, 1.00, 1.00, 1.00           | 1.00, 1.00, 1.00, 1.00            |
| Percentiles: 90%, 95%, 97.5%, 99%                       | 5.65, 6.15, 7.30, 9.52           | 5.50, 10.9, 14.2, 15.9            |
| Min, Max                                                | 1.00, 11.0                       | 1.00, 17.0                        |
| Missing                                                 | 1 (2.6%)                         | 0 (0%)                            |
| <b>Hypopharyngeal Residue: Present vs. Absent</b>       |                                  |                                   |
| Absent                                                  | 3 (7.7%)                         | 0 (0%)                            |
| Present                                                 | 36 (92.3%)                       | 39 (100%)                         |
| <b>Hypopharyngeal Residue: Amount When Present</b>      |                                  |                                   |
| Mean ( <i>SD</i> )                                      | 1.93 (0.888)                     | 1.82 (0.885)                      |
| Median [Q1, Q3]                                         | 2.00 [1.00, 2.13]                | 2.00 [1.00, 2.00]                 |
| Percentiles: 1%, 2.5%, 5%, 10%                          | 1.00, 1.00, 1.00, 1.00           | 1.00, 1.00, 1.00, 1.00            |
| Percentiles: 90%, 95%, 97.5%, 99%                       | 3.00, 3.25, 4.06, 4.33           | 2.50, 3.10, 4.08, 4.93            |
| Min, Max                                                | 1.00, 4.50                       | 1.00, 5.50                        |
| Missing                                                 | 3 (7.7%)                         | 0 (0%)                            |
| <b>Epiglottic Residue: Present vs. Absent</b>           |                                  |                                   |
| Absent                                                  | 18 (46.2%)                       | 0 (0%)                            |
| Present                                                 | 21 (53.8%)                       | 39 (100%)                         |
| <b>Epiglottic Residue: Amount When Present</b>          |                                  |                                   |
| Mean ( <i>SD</i> )                                      | 5.19 (4.12)                      | 7.91 (10.4)                       |
| Median [Q1, Q3]                                         | 4.00 [3.00, 6.00]                | 4.00 [2.50, 7.00]                 |
| Percentiles: 1%, 2.5%, 5%, 10%                          | 1.10, 1.25, 1.50, 2.00           | 1.00, 1.00, 1.45, 1.50            |
| Percentiles: 90%, 95%, 97.5%, 99%                       | 7.50, 8.00, 14.5, 18.4           | 17.6, 26.3, 38.7, 46.7            |
| Min, Max                                                | 1.00, 21.0                       | 1.00, 52.0                        |
| Missing                                                 | 18 (46.2%)                       | 0 (0%)                            |
| <b>Laryngeal Vestibule Residue: Present vs. Absent</b>  |                                  |                                   |
| Absent                                                  | 30 (76.9%)                       | 21 (53.8%)                        |
| Present                                                 | 9 (23.1%)                        | 18 (46.2%)                        |
| <b>Laryngeal Vestibule Residue: Amount When Present</b> |                                  |                                   |
| Mean ( <i>SD</i> )                                      | 3.61 (2.29)                      | 5.69 (6.36)                       |
| Median [Q1, Q3]                                         | 3.00 [2.00, 4.00]                | 3.00 [2.00, 6.00]                 |
| Percentiles: 1%, 2.5%, 5%, 10%                          | 1.08, 1.20, 1.40, 1.80           | 0.585, 0.713, 0.925, 1.00         |
| Percentiles: 90%, 95%, 97.5%, 99%                       | 7.10, 7.30, 7.40, 7.46           | 14.2, 18.1, 21.0, 22.8            |
| Min, Max                                                | 1.00, 7.50                       | 0.500, 24.0                       |
| Missing                                                 | 30 (76.9%)                       | 21 (53.8%)                        |
| <b>Vocal Fold Residue: Present vs. Absent</b>           |                                  |                                   |
| Absent                                                  | 39 (100%)                        | 34 (87.2%)                        |
| Present                                                 | 0 (0%)                           | 5 (12.8%)                         |

|                                                | Green opaque<br>( <i>N</i> = 39) | White coating<br>( <i>N</i> = 39) |
|------------------------------------------------|----------------------------------|-----------------------------------|
| <b>Vocal Fold Residue: Amount When Present</b> |                                  |                                   |
| Mean ( <i>SD</i> )                             | NA                               | 4.00 (2.15)                       |
| Median [Q1, Q3]                                | NA                               | 4.00 [3.50, 4.50]                 |
| Percentiles: 1%, 2.5%, 5%, 10%                 | NA                               | 1.10, 1.25, 1.50, 2.00            |
| Percentiles: 90%, 95%, 97.5%, 99%              | NA                               | 6.00, 6.50, 6.75, 6.90            |
| Min, Max                                       | NA                               | 1.00, 7.00                        |
| Missing                                        | 39 (100%)                        | 34 (87.2%)                        |
| <b>Subglottic Residue: Present vs. Absent</b>  |                                  |                                   |
| Absent                                         | 39 (100%)                        | 38 (97.4%)                        |
| Present                                        | 0 (0%)                           | 1 (2.6%)                          |
| <b>Subglottic Residue: Amount When Present</b> |                                  |                                   |
| Mean ( <i>SD</i> )                             | NA                               | NA                                |
| Median [Q1, Q3]                                | NA                               | 3.00 [3.00, 3.00]                 |
| Percentiles: 1%, 2.5%, 5%, 10%                 | NA                               | 3.00, 3.00, 3.00, 3.00            |
| Percentiles: 90%, 95%, 97.5%, 99%              | NA                               | 3.00, 3.00, 3.00, 3.00            |
| Min, Max                                       | NA                               | 3.00, 3.00                        |
| Missing                                        | 39 (100%)                        | 38 (97.4%)                        |
| <b>PAS</b>                                     |                                  |                                   |
| 1                                              | 30 (76.9%)                       | 20 (51.3%)                        |
| 2                                              | 0 (0%)                           | 0 (0%)                            |
| 3                                              | 9 (23.1%)                        | 14 (35.9%)                        |
| 4                                              | 0 (0%)                           | 0 (0%)                            |
| 5                                              | 0 (0%)                           | 4 (10.3%)                         |
| 6                                              | 0 (0%)                           | 0 (0%)                            |
| 7                                              | 0 (0%)                           | 0 (0%)                            |
| 8                                              | 0 (0%)                           | 1 (2.6%)                          |

**Swallow Condition: Self-Selected Volume of Thin Liquid via Cup, Single Swallow**

|                                                             | <b>Green opaque<br/>(N = 39)</b> | <b>White coating<br/>(N = 39)</b> |
|-------------------------------------------------------------|----------------------------------|-----------------------------------|
| <b>Sip/Bite Size</b>                                        |                                  |                                   |
| Mean (SD)                                                   | 18.1 (9.72)                      | 19.8 (10.6)                       |
| Median [Q1, Q3]                                             | 16.0 [12.0, 21.5]                | 18.0 [13.0, 22.5]                 |
| Percentiles: 1%, 2.5%, 5%, 10%                              | 5.00, 5.00, 5.90, 7.00           | 4.38, 4.95, 7.70, 9.00            |
| Percentiles: 90%, 95%, 97.5%, 99%                           | 30.6, 34.9, 43.2, 45.5           | 34.2, 42.0, 42.4, 47.0            |
| Min, Max                                                    | 5.00, 47.0                       | 4.00, 50.0                        |
| <b>Number of Swallows</b>                                   |                                  |                                   |
| 1                                                           | 30 (76.9%)                       | 31 (79.5%)                        |
| 2                                                           | 9 (23.1%)                        | 8 (20.5%)                         |
| <b>Bolus Location at Swallow Onset: Oral Cavity Only</b>    |                                  |                                   |
| Present                                                     | 21 (53.8%)                       | 25 (64.1%)                        |
| Absent                                                      | 16 (41.0%)                       | 12 (30.8%)                        |
| Missing                                                     | 2 (5.1%)                         | 2 (5.1%)                          |
| <b>Bolus Location at Swallow Onset: Oropharynx</b>          |                                  |                                   |
| Present                                                     | 16 (41.0%)                       | 11 (28.2%)                        |
| Absent                                                      | 21 (53.8%)                       | 26 (66.7%)                        |
| Missing                                                     | 2 (5.1%)                         | 2 (5.1%)                          |
| <b>Bolus Location at Swallow Onset: Hypopharynx</b>         |                                  |                                   |
| Present                                                     | 7 (17.9%)                        | 7 (17.9%)                         |
| Absent                                                      | 30 (76.9%)                       | 30 (76.9%)                        |
| Missing                                                     | 2 (5.1%)                         | 2 (5.1%)                          |
| <b>Bolus Location at Swallow Onset: Epiglottis</b>          |                                  |                                   |
| Present                                                     | 7 (17.9%)                        | 3 (7.7%)                          |
| Absent                                                      | 30 (76.9%)                       | 34 (87.2%)                        |
| Missing                                                     | 2 (5.1%)                         | 2 (5.1%)                          |
| <b>Bolus Location at Swallow Onset: Laryngeal Vestibule</b> |                                  |                                   |
| Present                                                     | 0 (0%)                           | 0 (0%)                            |
| Absent                                                      | 37 (94.9%)                       | 37 (94.9%)                        |
| Missing                                                     | 2 (5.1%)                         | 2 (5.1%)                          |
| <b>Bolus Location at Swallow Onset: Vocal Folds</b>         |                                  |                                   |
| Present                                                     | 0 (0%)                           | 0 (0%)                            |
| Absent                                                      | 37 (94.9%)                       | 37 (94.9%)                        |
| Missing                                                     | 2 (5.1%)                         | 2 (5.1%)                          |
| <b>Bolus Location at Swallow Onset: Subglottis</b>          |                                  |                                   |
| Absent                                                      | 37 (94.9%)                       | 37 (94.9%)                        |
| Missing                                                     | 2 (5.1%)                         | 2 (5.1%)                          |

|                                                         | Green opaque<br>( <i>N</i> = 39) | White coating<br>( <i>N</i> = 39) |
|---------------------------------------------------------|----------------------------------|-----------------------------------|
| <b>Oropharyngeal Residue: Present vs. Absent</b>        |                                  |                                   |
| Present                                                 | 39 (100%)                        | 39 (100%)                         |
| <b>Oropharyngeal Residue: Amount When Present</b>       |                                  |                                   |
| Mean ( <i>SD</i> )                                      | 2.78 (2.01)                      | 3.85 (5.64)                       |
| Median [Q1, Q3]                                         | 2.00 [1.50, 3.00]                | 2.00 [1.75, 3.25]                 |
| Percentiles: 1%, 2.5%, 5%, 10%                          | 1.00, 1.00, 1.00, 1.00           | 1.00, 1.00, 1.00, 1.00            |
| Percentiles: 90%, 95%, 97.5%, 99%                       | 5.00, 5.10, 6.30, 9.72           | 7.30, 10.1, 11.7, 25.7            |
| Min, Max                                                | 1.00, 12.0                       | 1.00, 35.0                        |
| <b>Hypopharyngeal Residue: Present vs. Absent</b>       |                                  |                                   |
| Absent                                                  | 1 (2.6%)                         | 0 (0%)                            |
| Present                                                 | 38 (97.4%)                       | 39 (100%)                         |
| <b>Hypopharyngeal Residue: Amount When Present</b>      |                                  |                                   |
| Mean ( <i>SD</i> )                                      | 1.95 (1.14)                      | 3.44 (9.98)                       |
| Median [Q1, Q3]                                         | 2.00 [1.00, 2.38]                | 1.50 [1.25, 2.25]                 |
| Percentiles: 1%, 2.5%, 5%, 10%                          | 1.00, 1.00, 1.00, 1.00           | 1.00, 1.00, 1.00, 1.00            |
| Percentiles: 90%, 95%, 97.5%, 99%                       | 3.15, 4.00, 4.15, 5.26           | 3.00, 3.55, 7.00, 41.2            |
| Min, Max                                                | 1.00, 6.00                       | 1.00, 64.0                        |
| Missing                                                 | 1 (2.6%)                         | 0 (0%)                            |
| <b>Epiglottic Residue: Present vs. Absent</b>           |                                  |                                   |
| Absent                                                  | 18 (46.2%)                       | 1 (2.6%)                          |
| Present                                                 | 21 (53.8%)                       | 38 (97.4%)                        |
| <b>Epiglottic Residue: Amount When Present</b>          |                                  |                                   |
| Mean ( <i>SD</i> )                                      | 5.93 (8.15)                      | 10.7 (13.2)                       |
| Median [Q1, Q3]                                         | 3.00 [2.00, 4.00]                | 5.00 [2.13, 12.3]                 |
| Percentiles: 1%, 2.5%, 5%, 10%                          | 1.00, 1.00, 1.00, 1.00           | 1.50, 1.50, 1.93, 2.00            |
| Percentiles: 90%, 95%, 97.5%, 99%                       | 9.00, 28.0, 29.5, 30.4           | 33.1, 40.9, 46.2, 47.3            |
| Min, Max                                                | 1.00, 31.0                       | 1.50, 48.0                        |
| Missing                                                 | 18 (46.2%)                       | 1 (2.6%)                          |
| <b>Laryngeal Vestibule Residue: Present vs. Absent</b>  |                                  |                                   |
| Absent                                                  | 29 (74.4%)                       | 20 (51.3%)                        |
| Present                                                 | 10 (25.6%)                       | 19 (48.7%)                        |
| <b>Laryngeal Vestibule Residue: Amount When Present</b> |                                  |                                   |
| Mean ( <i>SD</i> )                                      | 6.90 (9.01)                      | 9.87 (13.0)                       |
| Median [Q1, Q3]                                         | 4.00 [2.25, 5.50]                | 3.00 [2.00, 12.5]                 |
| Percentiles: 1%, 2.5%, 5%, 10%                          | 1.09, 1.23, 1.45, 1.90           | 1.00, 1.00, 1.00, 1.40            |
| Percentiles: 90%, 95%, 97.5%, 99%                       | 13.9, 22.5, 26.7, 29.3           | 33.4, 35.7, 38.9, 40.7            |
| Min, Max                                                | 1.00, 31.0                       | 1.00, 42.0                        |

|                                                | Green opaque<br>( <i>N</i> = 39) | White coating<br>( <i>N</i> = 39) |
|------------------------------------------------|----------------------------------|-----------------------------------|
| Missing                                        | 29 (74.4%)                       | 20 (51.3%)                        |
| <b>Vocal Fold Residue: Present vs. Absent</b>  |                                  |                                   |
| Absent                                         | 37 (94.9%)                       | 33 (84.6%)                        |
| Present                                        | 2 (5.1%)                         | 6 (15.4%)                         |
| <b>Vocal Fold Residue: Amount When Present</b> |                                  |                                   |
| Mean ( <i>SD</i> )                             | 9.00 (1.41)                      | 19.8 (20.5)                       |
| Median [Q1, Q3]                                | 9.00 [8.50, 9.50]                | 12.5 [4.38, 28.5]                 |
| Percentiles: 1%, 2.5%, 5%, 10%                 | 8.02, 8.05, 8.10, 8.20           | 3.03, 3.06, 3.13, 3.25            |
| Percentiles: 90%, 95%, 97.5%, 99%              | 9.80, 9.90, 9.95, 9.98           | 43.5, 49.3, 52.1, 53.9            |
| Min, Max                                       | 8.00, 10.0                       | 3.00, 55.0                        |
| Missing                                        | 37 (94.9%)                       | 33 (84.6%)                        |
| <b>Subglottic Residue: Present vs. Absent</b>  |                                  |                                   |
| Absent                                         | 38 (97.4%)                       | 38 (97.4%)                        |
| Present                                        | 1 (2.6%)                         | 1 (2.6%)                          |
| <b>Subglottic Residue: Amount When Present</b> |                                  |                                   |
| Mean ( <i>SD</i> )                             | NA                               | NA                                |
| Median [Q1, Q3]                                | 1.00 [1.00, 1.00]                | 10.0 [10.0, 10.0]                 |
| Percentiles: 1%, 2.5%, 5%, 10%                 | 1.00, 1.00, 1.00, 1.00           | 10.0, 10.0, 10.0, 10.0            |
| Percentiles: 90%, 95%, 97.5%, 99%              | 1.00, 1.00, 1.00, 1.00           | 10.0, 10.0, 10.0, 10.0            |
| Min, Max                                       | 1.00, 1.00                       | 10.0, 10.0                        |
| Missing                                        | 38 (97.4%)                       | 38 (97.4%)                        |
| <b>PAS</b>                                     |                                  |                                   |
| 1                                              | 29 (74.4%)                       | 19 (48.7%)                        |
| 2                                              | 0 (0%)                           | 0 (0%)                            |
| 3                                              | 8 (20.5%)                        | 14 (35.9%)                        |
| 4                                              | 0 (0%)                           | 0 (0%)                            |
| 5                                              | 1 (2.6%)                         | 5 (12.8%)                         |
| 6                                              | 0 (0%)                           | 0 (0%)                            |
| 7                                              | 1 (2.6%)                         | 0 (0%)                            |
| 8                                              | 0 (0%)                           | 1 (2.6%)                          |

**Swallow Condition: 90 mL of Thin Liquid via Cup, Uninterrupted Sequential Swallows**

|                                                             | <b>White coating<br/>(N = 39)</b> |
|-------------------------------------------------------------|-----------------------------------|
| <b>Number of Swallows</b>                                   |                                   |
| 1                                                           | 2 (5.1%)                          |
| 2                                                           | 1 (2.6%)                          |
| 3                                                           | 3 (7.7%)                          |
| 4                                                           | 6 (15.4%)                         |
| 5                                                           | 8 (20.5%)                         |
| 6                                                           | 2 (5.1%)                          |
| 7                                                           | 5 (12.8%)                         |
| 8                                                           | 3 (7.7%)                          |
| 9                                                           | 3 (7.7%)                          |
| 11                                                          | 2 (5.1%)                          |
| 13                                                          | 2 (5.1%)                          |
| 14                                                          | 2 (5.1%)                          |
| <b>Bolus Location at Swallow Onset: Oral Cavity Only</b>    |                                   |
| Present                                                     | 24 (61.5%)                        |
| Absent                                                      | 13 (33.3%)                        |
| Missing                                                     | 2 (5.1%)                          |
| <b>Bolus Location at Swallow Onset: Oropharynx</b>          |                                   |
| Present                                                     | 11 (28.2%)                        |
| Absent                                                      | 26 (66.7%)                        |
| Missing                                                     | 2 (5.1%)                          |
| <b>Bolus Location at Swallow Onset: Hypopharynx</b>         |                                   |
| Present                                                     | 5 (12.8%)                         |
| Absent                                                      | 32 (82.1%)                        |
| Missing                                                     | 2 (5.1%)                          |
| <b>Bolus Location at Swallow Onset: Epiglottis</b>          |                                   |
| Present                                                     | 1 (2.6%)                          |
| Absent                                                      | 36 (92.3%)                        |
| Missing                                                     | 2 (5.1%)                          |
| <b>Bolus Location at Swallow Onset: Laryngeal Vestibule</b> |                                   |
| Present                                                     | 1 (2.6%)                          |
| Absent                                                      | 36 (92.3%)                        |
| Missing                                                     | 2 (5.1%)                          |
| <b>Bolus Location at Swallow Onset: Vocal Folds</b>         |                                   |
| Present                                                     | 0 (0%)                            |
| Absent                                                      | 37 (94.9%)                        |
| Missing                                                     | 2 (5.1%)                          |

|                                                         | White coating<br>( <i>N</i> = 39) |
|---------------------------------------------------------|-----------------------------------|
| <b>Bolus Location at Swallow Onset: Subglottis</b>      |                                   |
| Absent                                                  | 37 (94.9%)                        |
| Missing                                                 | 2 (5.1%)                          |
| <b>Oropharyngeal Residue: Present vs. Absent</b>        |                                   |
| Present                                                 | 39 (100%)                         |
| <b>Oropharyngeal Residue: Amount When Present</b>       |                                   |
| Mean ( <i>SD</i> )                                      | 2.35 (1.22)                       |
| Median [Q1, Q3]                                         | 2.00 [1.50, 3.00]                 |
| Percentiles: 1%, 2.5%, 5%, 10%                          | 1.00, 1.00, 1.00, 1.00            |
| Percentiles: 90%, 95%, 97.5%, 99%                       | 3.50, 4.20, 6.00, 6.00            |
| Min, Max                                                | 1.00, 6.00                        |
| <b>Hypopharyngeal Residue: Present vs. Absent</b>       |                                   |
| Present                                                 | 39 (100%)                         |
| <b>Hypopharyngeal Residue: Amount When Present</b>      |                                   |
| Mean ( <i>SD</i> )                                      | 1.87 (0.723)                      |
| Median [Q1, Q3]                                         | 2.00 [1.25, 2.50]                 |
| Percentiles: 1%, 2.5%, 5%, 10%                          | 1.00, 1.00, 1.00, 1.00            |
| Percentiles: 90%, 95%, 97.5%, 99%                       | 2.60, 3.00, 3.05, 3.62            |
| Min, Max                                                | 1.00, 4.00                        |
| <b>Epiglottic Residue: Present vs. Absent</b>           |                                   |
| Absent                                                  | 1 (2.6%)                          |
| Present                                                 | 38 (97.4%)                        |
| <b>Epiglottic Residue: Amount When Present</b>          |                                   |
| Mean ( <i>SD</i> )                                      | 7.42 (12.6)                       |
| Median [Q1, Q3]                                         | 3.00 [2.00, 6.88]                 |
| Percentiles: 1%, 2.5%, 5%, 10%                          | 1.00, 1.00, 1.00, 1.35            |
| Percentiles: 90%, 95%, 97.5%, 99%                       | 14.9, 21.3, 42.3, 58.9            |
| Min, Max                                                | 1.00, 70.0                        |
| Missing                                                 | 1 (2.6%)                          |
| <b>Laryngeal Vestibule Residue: Present vs. Absent</b>  |                                   |
| Absent                                                  | 19 (48.7%)                        |
| Present                                                 | 20 (51.3%)                        |
| <b>Laryngeal Vestibule Residue: Amount When Present</b> |                                   |
| Mean ( <i>SD</i> )                                      | 4.85 (8.52)                       |
| Median [Q1, Q3]                                         | 2.75 [2.00, 3.00]                 |
| Percentiles: 1%, 2.5%, 5%, 10%                          | 1.00, 1.00, 1.00, 1.45            |
| Percentiles: 90%, 95%, 97.5%, 99%                       | 8.10, 10.6, 25.3, 34.1            |

|                                                | White coating<br>( <i>N</i> = 39) |
|------------------------------------------------|-----------------------------------|
| Min, Max                                       | 1.00, 40.0                        |
| Missing                                        | 19 (48.7%)                        |
| <b>Vocal Fold Residue: Present vs. Absent</b>  |                                   |
| Absent                                         | 33 (84.6%)                        |
| Present                                        | 6 (15.4%)                         |
| <b>Vocal Fold Residue: Amount When Present</b> |                                   |
| Mean ( <i>SD</i> )                             | 8.42 (15.5)                       |
| Median [Q1, Q3]                                | 2.25 [2.00, 2.88]                 |
| Percentiles: 1%, 2.5%, 5%, 10%                 | 1.05, 1.13, 1.25, 1.50            |
| Percentiles: 90%, 95%, 97.5%, 99%              | 21.5, 30.8, 35.4, 38.2            |
| Min, Max                                       | 1.00, 40.0                        |
| Missing                                        | 33 (84.6%)                        |
| <b>Subglottic Residue: Present vs. Absent</b>  |                                   |
| Absent                                         | 38 (97.4%)                        |
| Present                                        | 1 (2.6%)                          |
| <b>Subglottic Residue: Amount When Present</b> |                                   |
| Mean ( <i>SD</i> )                             | NA                                |
| Median [Q1, Q3]                                | 24.0 [24.0, 24.0]                 |
| Percentiles: 1%, 2.5%, 5%, 10%                 | 24.0, 24.0, 24.0, 24.0            |
| Percentiles: 90%, 95%, 97.5%, 99%              | 24.0, 24.0, 24.0, 24.0            |
| Min, Max                                       | 24.0, 24.0                        |
| Missing                                        | 38 (97.4%)                        |
| <b>PAS</b>                                     |                                   |
| 1                                              | 17 (43.6%)                        |
| 2                                              | 2 (5.1%)                          |
| 3                                              | 14 (35.9%)                        |
| 4                                              | 0 (0%)                            |
| 5                                              | 5 (12.8%)                         |
| 6                                              | 0 (0%)                            |
| 7                                              | 1 (2.6%)                          |
| 8                                              | 0 (0%)                            |



**Swallow Condition: 5 mL of Blue Pudding via Spoon, Single Swallow**

|                                                             | <b>Blue opaque<br/>(N = 77)</b> |
|-------------------------------------------------------------|---------------------------------|
| <b>Number of Swallows</b>                                   |                                 |
| 1                                                           | 64 (83.1%)                      |
| 2                                                           | 12 (15.6%)                      |
| 3                                                           | 1 (1.3%)                        |
| <b>Bolus Location at Swallow Onset: Oral Cavity Only</b>    |                                 |
| Present                                                     | 39 (50.6%)                      |
| Absent                                                      | 37 (48.1%)                      |
| Missing                                                     | 1 (1.3%)                        |
| <b>Bolus Location at Swallow Onset: Oropharynx</b>          |                                 |
| Present                                                     | 35 (45.5%)                      |
| Absent                                                      | 41 (53.2%)                      |
| Missing                                                     | 1 (1.3%)                        |
| <b>Bolus Location at Swallow Onset: Hypopharynx</b>         |                                 |
| Present                                                     | 4 (5.2%)                        |
| Absent                                                      | 71 (92.2%)                      |
| Missing                                                     | 2 (2.6%)                        |
| <b>Bolus Location at Swallow Onset: Epiglottis</b>          |                                 |
| Present                                                     | 10 (13.0%)                      |
| Absent                                                      | 66 (85.7%)                      |
| Missing                                                     | 1 (1.3%)                        |
| <b>Bolus Location at Swallow Onset: Laryngeal Vestibule</b> |                                 |
| Present                                                     | 1 (1.3%)                        |
| Absent                                                      | 75 (97.4%)                      |
| Missing                                                     | 1 (1.3%)                        |
| <b>Bolus Location at Swallow Onset: Vocal Folds</b>         |                                 |
| Present                                                     | 0 (0%)                          |
| Absent                                                      | 76 (98.7%)                      |
| Missing                                                     | 1 (1.3%)                        |
| <b>Bolus Location at Swallow Onset: Subglottis</b>          |                                 |
| Absent                                                      | 76 (98.7%)                      |
| Missing                                                     | 1 (1.3%)                        |
| <b>Oropharyngeal Residue: Present vs. Absent</b>            |                                 |
| Absent                                                      | 6 (7.8%)                        |
| Present                                                     | 71 (92.2%)                      |
| <b>Oropharyngeal Residue: Amount When Present</b>           |                                 |
| Mean (SD)                                                   | 5.37 (11.0)                     |
| Median [Q1, Q3]                                             | 3.00 [2.00, 4.75]               |

|                                                         | <b>Blue opaque<br/>(<i>N</i> = 77)</b> |
|---------------------------------------------------------|----------------------------------------|
| Percentiles: 1%, 2.5%, 5%, 10%                          | 1.00, 1.00, 1.00, 1.00                 |
| Percentiles: 90%, 95%, 97.5%, 99%                       | 7.50, 11.8, 19.8, 50.5                 |
| Min, Max                                                | 1.00, 89.0                             |
| Missing                                                 | 6 (7.8%)                               |
| <b>Hypopharyngeal Residue: Present vs. Absent</b>       |                                        |
| Absent                                                  | 18 (23.4%)                             |
| Present                                                 | 59 (76.6%)                             |
| <b>Hypopharyngeal Residue: Amount When Present</b>      |                                        |
| Mean ( <i>SD</i> )                                      | 2.04 (2.68)                            |
| Median [Q1, Q3]                                         | 1.50 [1.00, 2.00]                      |
| Percentiles: 1%, 2.5%, 5%, 10%                          | 1.00, 1.00, 1.00, 1.00                 |
| Percentiles: 90%, 95%, 97.5%, 99%                       | 3.00, 4.00, 5.10, 12.3                 |
| Min, Max                                                | 1.00, 21.0                             |
| Missing                                                 | 18 (23.4%)                             |
| <b>Epiglottic Residue: Present vs. Absent</b>           |                                        |
| Absent                                                  | 44 (57.1%)                             |
| Present                                                 | 33 (42.9%)                             |
| <b>Epiglottic Residue: Amount When Present</b>          |                                        |
| Mean ( <i>SD</i> )                                      | 6.14 (7.64)                            |
| Median [Q1, Q3]                                         | 4.00 [2.50, 6.00]                      |
| Percentiles: 1%, 2.5%, 5%, 10%                          | 1.16, 1.40, 1.50, 2.00                 |
| Percentiles: 90%, 95%, 97.5%, 99%                       | 11.0, 16.3, 26.0, 35.6                 |
| Min, Max                                                | 1.00, 42.0                             |
| Missing                                                 | 44 (57.1%)                             |
| <b>Laryngeal Vestibule Residue: Present vs. Absent</b>  |                                        |
| Absent                                                  | 77 (100%)                              |
| <b>Laryngeal Vestibule Residue: Amount When Present</b> |                                        |
| Mean ( <i>SD</i> )                                      | NA                                     |
| Median [Q1, Q3]                                         | NA                                     |
| Percentiles: 1%, 2.5%, 5%, 10%                          | NA                                     |
| Percentiles: 90%, 95%, 97.5%, 99%                       | NA                                     |
| Min, Max                                                | NA                                     |
| Missing                                                 | 77 (100%)                              |
| <b>Vocal Fold Residue: Present vs. Absent</b>           |                                        |
| Absent                                                  | 77 (100%)                              |
| <b>Vocal Fold Residue: Amount When Present</b>          |                                        |
| Mean ( <i>SD</i> )                                      | NA                                     |

|                                                | <b>Blue opaque<br/>(<i>N</i> = 77)</b> |
|------------------------------------------------|----------------------------------------|
| Median [Q1, Q3]                                | NA                                     |
| Percentiles: 1%, 2.5%, 5%, 10%                 | NA                                     |
| Percentiles: 90%, 95%, 97.5%, 99%              | NA                                     |
| Min, Max                                       | NA                                     |
| Missing                                        | 77 (100%)                              |
| <b>Subglottic Residue: Present vs. Absent</b>  |                                        |
| Absent                                         | 77 (100%)                              |
| <b>Subglottic Residue: Amount When Present</b> |                                        |
| Mean ( <i>SD</i> )                             | NA                                     |
| Median [Q1, Q3]                                | NA                                     |
| Percentiles: 1%, 2.5%, 5%, 10%                 | NA                                     |
| Percentiles: 90%, 95%, 97.5%, 99%              | NA                                     |
| Min, Max                                       | NA                                     |
| Missing                                        | 77 (100%)                              |
| <b>PAS</b>                                     |                                        |
| 1                                              | 76 (98.7%)                             |
| 2                                              | 1 (1.3%)                               |
| 3                                              | 0 (0%)                                 |
| 4                                              | 0 (0%)                                 |
| 5                                              | 0 (0%)                                 |
| 6                                              | 0 (0%)                                 |
| 7                                              | 0 (0%)                                 |
| 8                                              | 0 (0%)                                 |

## Swallow Condition: Self-Selected Volume of Cracker, Single Swallow

|                                                             | Natural/non-colored<br>( <i>N</i> = 78) |
|-------------------------------------------------------------|-----------------------------------------|
| <b>Bite Size (grams)</b>                                    |                                         |
| Mean ( <i>SD</i> )                                          | 1.33 (0.722)                            |
| Median [Q1, Q3]                                             | 1.05 [0.809, 1.58]                      |
| Min, Max                                                    | 0.440, 3.09                             |
| <b>Number of Swallows</b>                                   |                                         |
| 1                                                           | 65 (83.3%)                              |
| 2                                                           | 10 (12.8%)                              |
| 3                                                           | 3 (3.8%)                                |
| <b>Bolus Location at Swallow Onset: Oral Cavity Only</b>    |                                         |
| Present                                                     | 32 (41.0%)                              |
| Absent                                                      | 46 (59.0%)                              |
| <b>Bolus Location at Swallow Onset: Oropharynx</b>          |                                         |
| Present                                                     | 46 (59.0%)                              |
| Absent                                                      | 32 (41.0%)                              |
| <b>Bolus Location at Swallow Onset: Hypopharynx</b>         |                                         |
| Present                                                     | 5 (6.4%)                                |
| Absent                                                      | 72 (92.3%)                              |
| Missing                                                     | 1 (1.3%)                                |
| <b>Bolus Location at Swallow Onset: Epiglottis</b>          |                                         |
| Present                                                     | 13 (16.7%)                              |
| Absent                                                      | 65 (83.3%)                              |
| <b>Bolus Location at Swallow Onset: Laryngeal Vestibule</b> |                                         |
| Present                                                     | 0 (0%)                                  |
| Absent                                                      | 78 (100%)                               |
| <b>Bolus Location at Swallow Onset: Vocal Folds</b>         |                                         |
| Present                                                     | 0 (0%)                                  |
| Absent                                                      | 78 (100%)                               |
| <b>Bolus Location at Swallow Onset: Subglottis</b>          |                                         |
| Absent                                                      | 78 (100%)                               |
| <b>Oropharyngeal Residue: Present vs. Absent</b>            |                                         |
| Absent                                                      | 22 (28.2%)                              |
| Present                                                     | 56 (71.8%)                              |
| <b>Oropharyngeal Residue: Amount When Present</b>           |                                         |
| Mean ( <i>SD</i> )                                          | 3.19 (5.01)                             |
| Median [Q1, Q3]                                             | 2.00 [1.38, 3.63]                       |
| Percentiles: 1%, 2.5%, 5%, 10%                              | 1.00, 1.00, 1.00, 1.00                  |
| Percentiles: 90%, 95%, 97.5%, 99%                           | 5.25, 6.13, 6.81, 21.0                  |

|                                                         | Natural/non-colored<br>( <i>N</i> = 78) |
|---------------------------------------------------------|-----------------------------------------|
| Min, Max                                                | 1.00, 38.0                              |
| Missing                                                 | 22 (28.2%)                              |
| <b>Hypopharyngeal Residue: Present vs. Absent</b>       |                                         |
| Absent                                                  | 45 (57.7%)                              |
| Present                                                 | 33 (42.3%)                              |
| <b>Hypopharyngeal Residue: Amount When Present</b>      |                                         |
| Mean ( <i>SD</i> )                                      | 1.55 (0.617)                            |
| Median [Q1, Q3]                                         | 1.50 [1.00, 2.00]                       |
| Percentiles: 1%, 2.5%, 5%, 10%                          | 1.00, 1.00, 1.00, 1.00                  |
| Percentiles: 90%, 95%, 97.5%, 99%                       | 2.00, 2.70, 3.10, 3.34                  |
| Min, Max                                                | 1.00, 3.50                              |
| Missing                                                 | 45 (57.7%)                              |
| <b>Epiglottic Residue: Present vs. Absent</b>           |                                         |
| Absent                                                  | 64 (82.1%)                              |
| Present                                                 | 14 (17.9%)                              |
| <b>Epiglottic Residue: Amount When Present</b>          |                                         |
| Mean ( <i>SD</i> )                                      | 3.93 (4.32)                             |
| Median [Q1, Q3]                                         | 2.50 [1.00, 4.50]                       |
| Percentiles: 1%, 2.5%, 5%, 10%                          | 1.00, 1.00, 1.00, 1.00                  |
| Percentiles: 90%, 95%, 97.5%, 99%                       | 9.90, 13.1, 14.0, 14.6                  |
| Min, Max                                                | 1.00, 15.0                              |
| Missing                                                 | 64 (82.1%)                              |
| <b>Laryngeal Vestibule Residue: Present vs. Absent</b>  |                                         |
| Absent                                                  | 78 (100%)                               |
| <b>Laryngeal Vestibule Residue: Amount When Present</b> |                                         |
| Mean ( <i>SD</i> )                                      | NA                                      |
| Median [Q1, Q3]                                         | NA                                      |
| Percentiles: 1%, 2.5%, 5%, 10%                          | NA                                      |
| Percentiles: 90%, 95%, 97.5%, 99%                       | NA                                      |
| Min, Max                                                | NA                                      |
| Missing                                                 | 78 (100%)                               |
| <b>Vocal Fold Residue: Present vs. Absent</b>           |                                         |
| Absent                                                  | 78 (100%)                               |
| <b>Vocal Fold Residue: Amount When Present</b>          |                                         |
| Mean ( <i>SD</i> )                                      | NA                                      |
| Median [Q1, Q3]                                         | NA                                      |
| Percentiles: 1%, 2.5%, 5%, 10%                          | NA                                      |

| Natural/non-colored<br>( <i>N</i> = 78) |           |
|-----------------------------------------|-----------|
| PAS                                     |           |
| 1                                       | 78 (100%) |
| 2                                       | 0 (0%)    |
| 3                                       | 0 (0%)    |
| 4                                       | 0 (0%)    |
| 5                                       | 0 (0%)    |
| 6                                       | 0 (0%)    |
| 7                                       | 0 (0%)    |
| 8                                       | 0 (0%)    |
